# Supplementary material for: Hemin induces autophagy in a leukemic erythroblast cell line through the LRP1 receptor
Source: Oxford University Press journal article supplement (doi:10.1042/bsr20181156), 2018-12-06

# Supplementary Figure 1

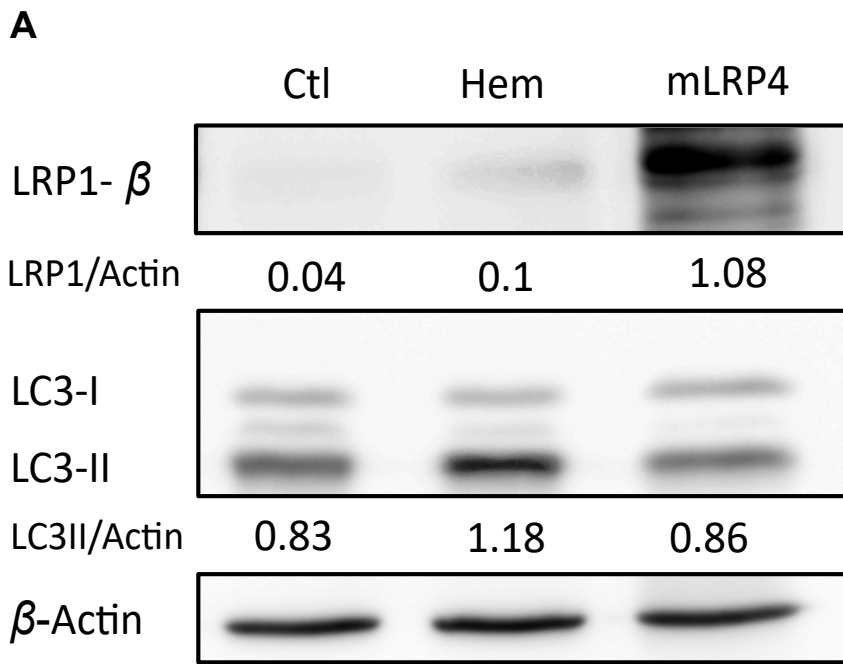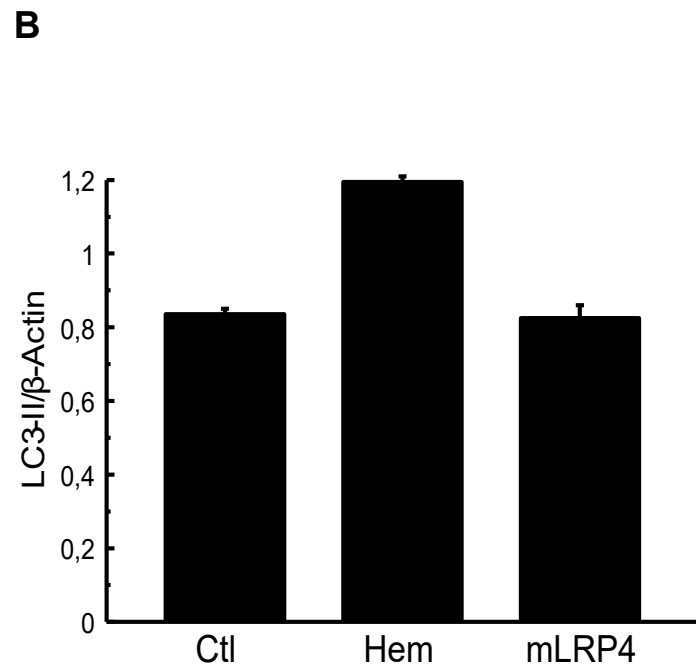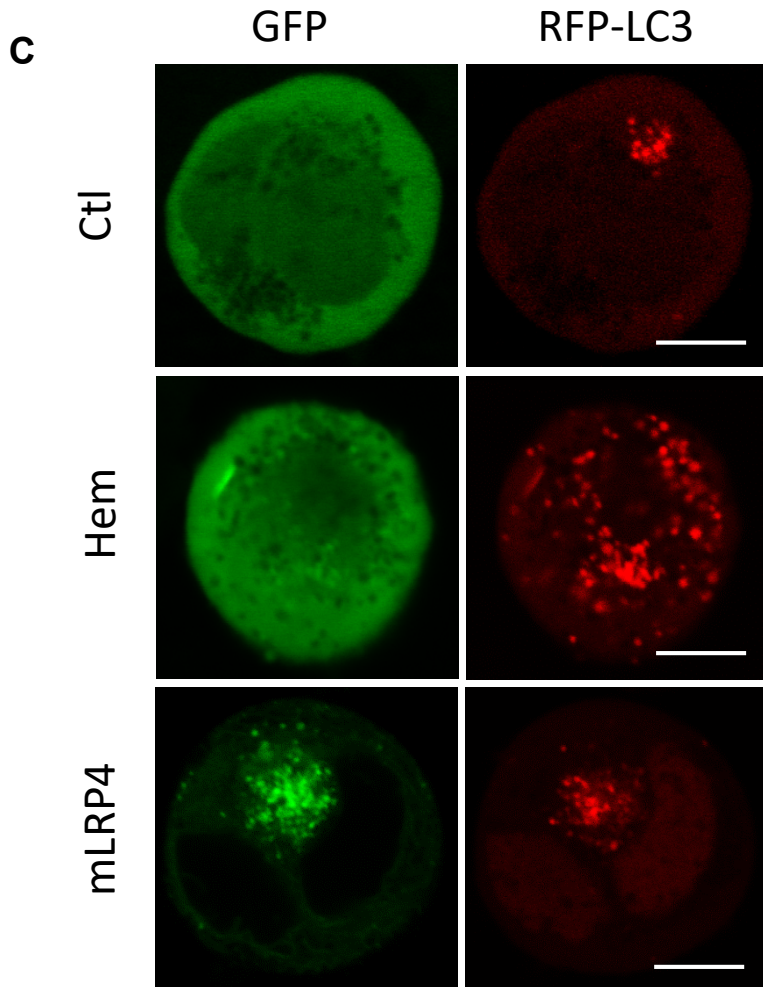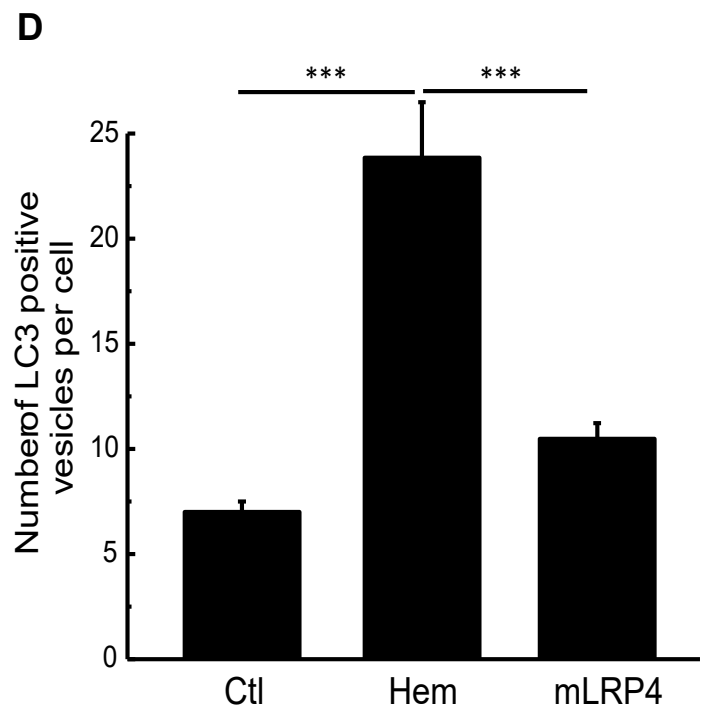

# Supplementary Figure 2

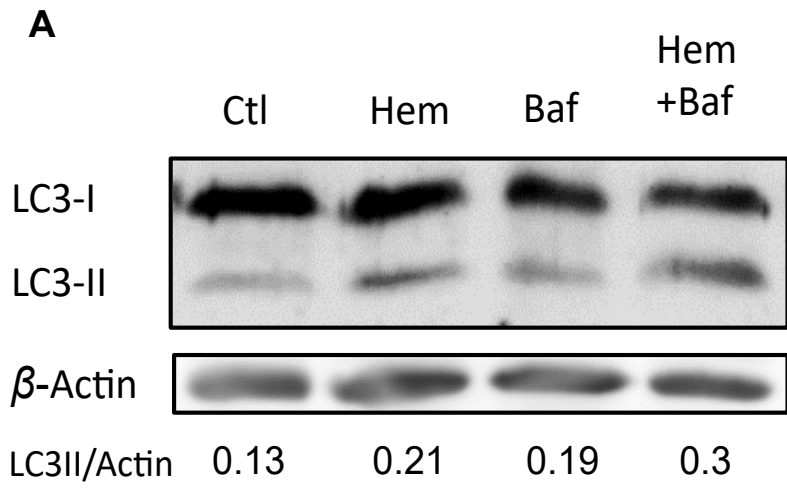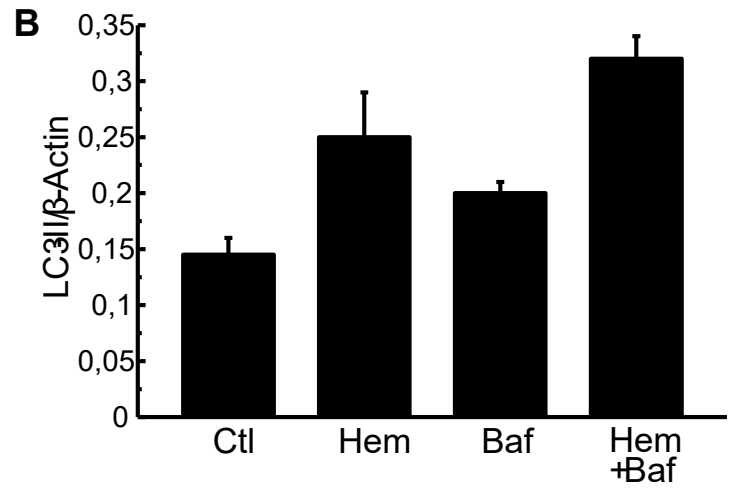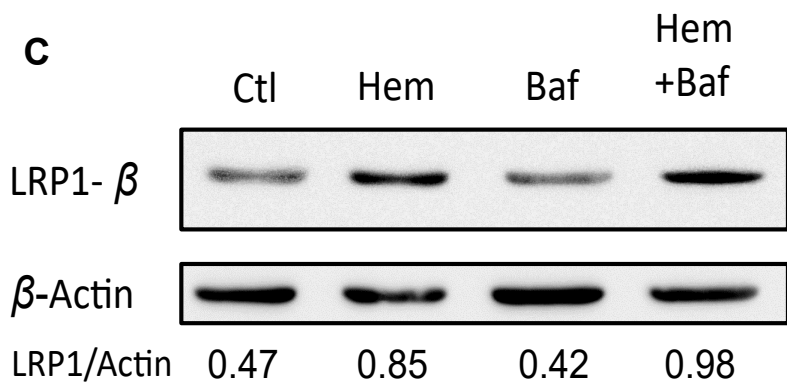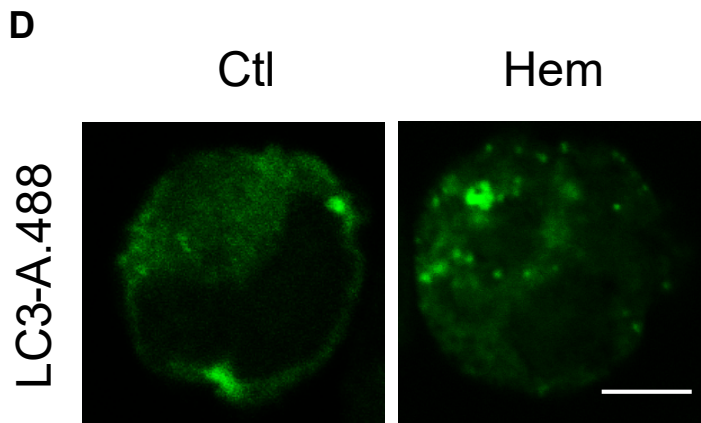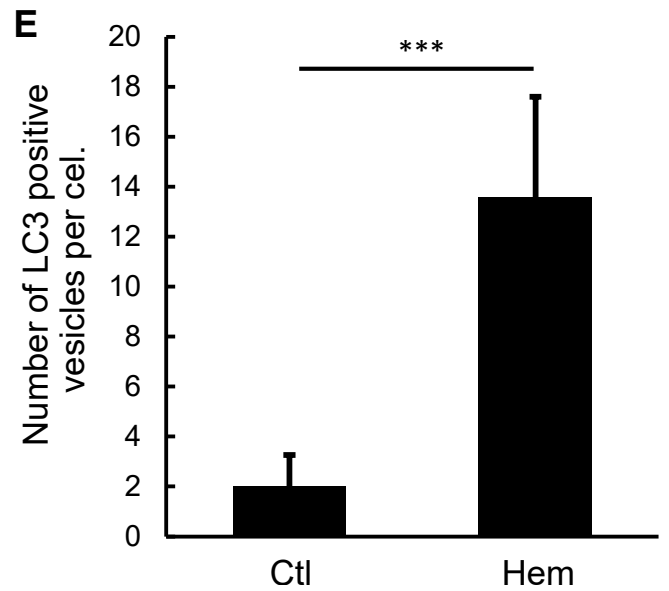

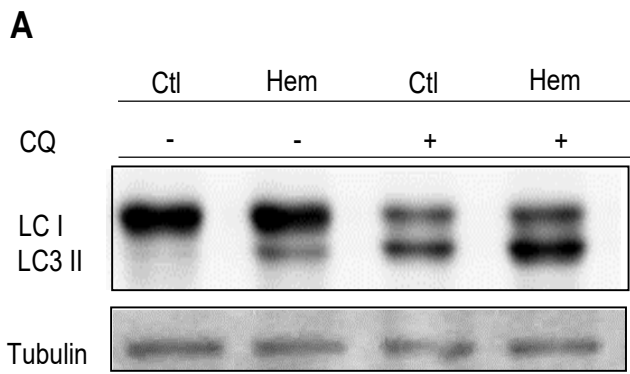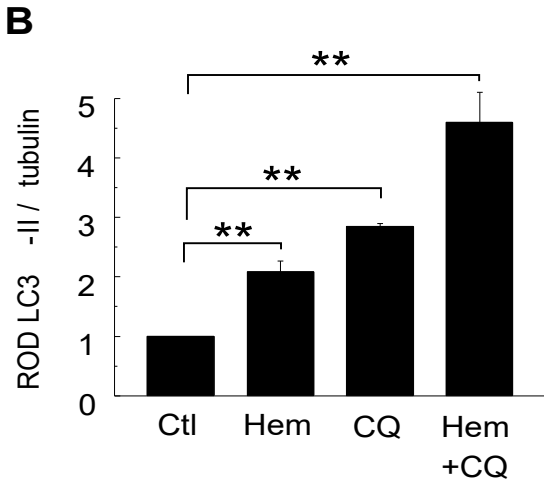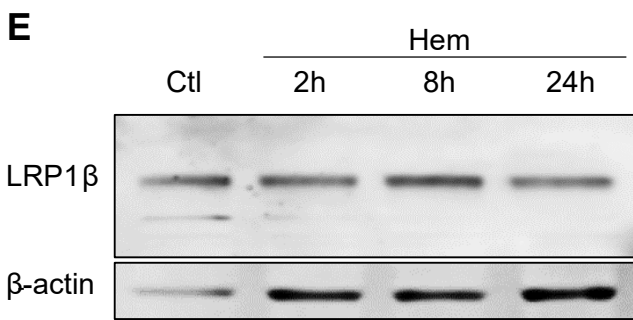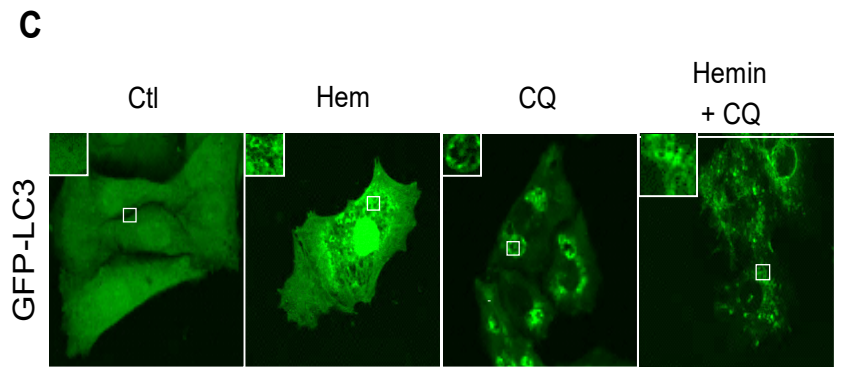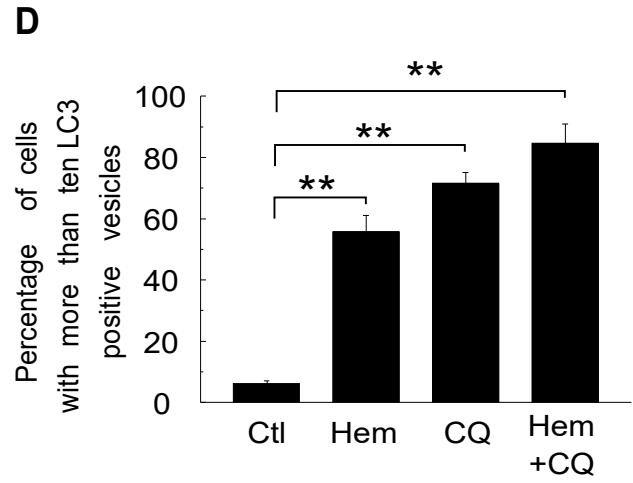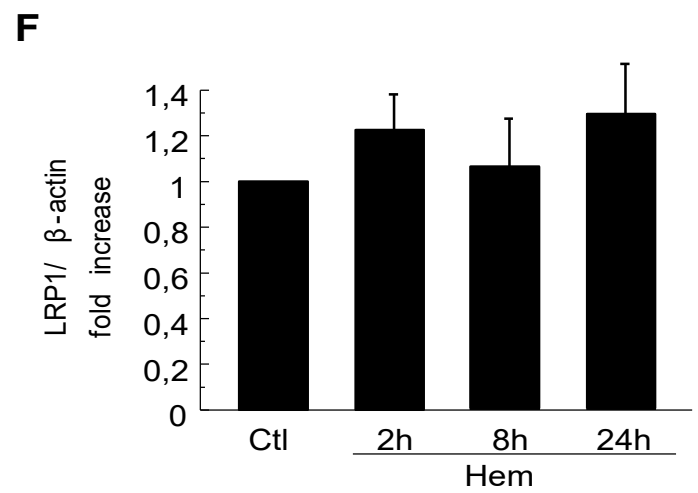

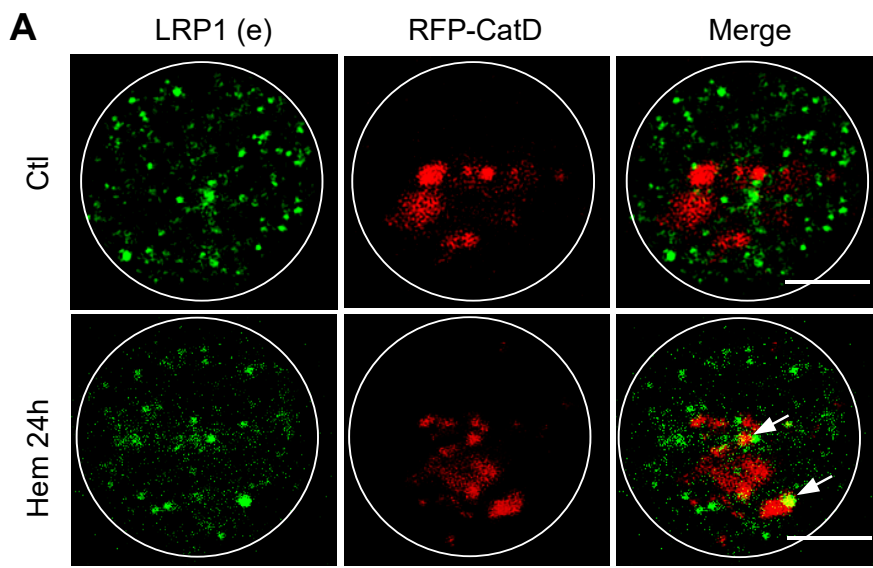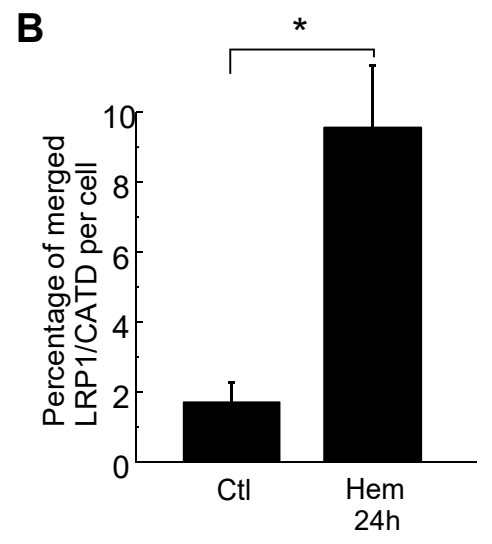

Supplement: bsr-2018-1156_supp.pdf [file bsr-2018-1156_supp.pdf]
